22 **Background:** According to the World Health Organization (WHO), approximately 322 million  
23 individuals globally were grappling with depressive disorders in 2015. During pregnancy, the  
24 risk of experiencing depression is elevated due to certain hormonal changes. Despite the  
25 potentially severe consequences of antenatal depression for both the mother and newborn, there  
26 have been limited studies conducted on this issue in Bangladesh.

27 **Objective:** To find out the prevalence and associated factors of antenatal depression in a rural  
28 sub-district in Bangladesh.

29 **Method:** A cross-sectional study was performed in Lohagara, a rural subdistrict in Narail,  
30 situated in the southern part of Bangladesh between January 08 and 14, 2024. 350 subjects were  
31 recruited for the study, who were pregnant at various trimesters and attended antenatal check-ups  
32 in a government health complex and a private hospital in Lohagara. The Bengali-translated  
33 version of the Edinburgh Postnatal Depression Scale (EPDS) and a structured questionnaire were  
34 used for data collection. Data were analyzed in STATA version 14.

35 **Result:** The point prevalence of antenatal depression is 39% (38.86%, in 95% CI: 33.9% to  
36 44%). Gestational week (AOR: 0.4, 95% CI: 0.2, 0.8), unintended pregnancy (AOR: 1.7, 95%  
37 CI: 1, 3), intimate partner violence (AOR: 3.3, 95% CI: 1.1, 9.7), a history of previous diseases  
38 (AOR: 2.4, 95% CI: 1.1, 5.2), and the history of having polygamous husbands (AOR: 13.6, 95%  
39 CI: 1.1, 164) are found to be significantly associated with the development of depression in the  
40 prenatal period.

41 **Conclusion:** In rural Narail, high rates of antenatal depression underscore the importance of  
42 increased awareness among healthcare professionals and families. Strategic involvement of  
43 stakeholders and policymakers is essential to address issues like intimate partner violence and

44 polygamy. Moreover, there's a critical need for extra care and counseling for pregnant women  
45 with a history of health problems or facing unexpected pregnancies.

46

## 47 **Introduction**

48 Globally, depression stands out as a prevalent mental health disorder, marked by symptoms such  
49 as a low mood, changes in appetite and sleep patterns, loss of interest in activities, significant  
50 weight fluctuations, feelings of hopelessness, concentration difficulties, low self-esteem, and  
51 frequent thoughts of mortality. It holds a prominent position among the top five causes of the  
52 global disease burden (1). Projections suggest that by 2030, depressive disorders will likely  
53 become one of the three leading contributors to the overall global burden of disease (2).

54 In 2015, the World Health Organization (WHO) approximated that there were 322 million  
55 individuals globally experiencing depressive disorders and 27% of them were from the Southeast  
56 Asian region (1). The risk of mental disorders, especially depression is more in females than in  
57 males (3). In pregnancy, the risk of depression is higher than general female population due to  
58 hormonal changes (4). The global occurrence of antenatal depression ranges from 15% to 65%  
59 (5). In high-income countries, the prevalence ranges from 5% to 30% (6, 7, 8), while in low-  
60 income countries, it is 15.6% to 31.1% (9, 10, 11).

61 The occurrence of depression during pregnancy in Bangladesh varies between 18% and 33%  
62 (12), which is not too small. A recent study, carried out in a rural sub-district in Matlab,  
63 involving pregnant women at their 34-35 weeks of pregnancy showed a 33% prevalence and the  
64 associated factors included an unsupportive husband or mother-in-law, domestic violence, and  
65 mental pressure for male gender preference of the family (13). A recent cross-sectional study,

66 conducted in rural Sylhet highlighted male gender preference of husband, low family support,  
67 and sexual violence as the main associated factors for developing antenatal depression (12).

68 The consequences of depression in pregnancy can be devastating and it may affect both mother  
69 and child. A pregnant woman experiencing depression may release a hormone called cortisol,  
70 which can have detrimental effects on fetal growth and brain development (14). Women with  
71 antenatal depression have a higher risk of developing Hyperemesis gravidarum, which increases  
72 the probability of miscarriage, low birth weight, and preterm birth (15). Not only that, the risk of  
73 substance abuse, preeclampsia, hemorrhage, edema, postpartum depression, and severe  
74 headaches is higher in a woman with antenatal depression (16, 17). The neonatal outcomes of  
75 antenatal depression are reported as low birth weight (LBW), low mean APGAR scores at 1 and  
76 5 minutes following birth, and premature mortality (18, 19).

77 Antenatal depression poses a significant challenge for expectant mothers, particularly in  
78 Bangladesh. Research on this topic is predominantly limited to rural areas, with scant urban-  
79 based studies available. Moreover, there is a notable dearth of information regarding the  
80 prevalence of depression during different trimesters of pregnancy in Bangladesh. This gap in  
81 research underscores the need for a more comprehensive understanding of antenatal depression  
82 across diverse geographic and demographic settings in the country. The absence of research on  
83 antenatal depression in Narail, a southern district in Bangladesh, underscores the significance of  
84 this study. By shedding light on the current status of antenatal depression at the sub-district level  
85 in Narail, this research aims to provide a crucial snapshot of the situation. The findings from this  
86 study can play a pivotal role in identifying necessary interventions, informing policy-making  
87 decisions, and structuring health education programs. The ultimate goal is to enhance awareness  
88 and establish effective measures for controlling antenatal depression in the future.

89

## 90 **Method**

### 91 **Study Design and Setting**

92 A cross-sectional study was performed between January 08 and 14, 2024 in Upazila Health  
93 Complex, Lohagara, a government hospital, and Khan General Hospital, Lahuria, a private  
94 hospital in Lohagara, a rural sub-district in Narail, situated in the southern part of Bangladesh.

### 95 **Study Participants**

96 The target population was pregnant mothers of any trimester in the Lohagara sub-district and the  
97 sample population was pregnant mothers of any trimesters attending the ANC Corner of Upazila  
98 Health Complex, Lohagara, Narail, and Khan General Hospital, Lahuria for antenatal checkups.

### 99 **Sample Size and Sampling Technique**

100 Considering the prevalence of antenatal depression in Bangladesh is 33% according to a study  
101 conducted in a rural sub-district in Matlab (13), 95% confidence interval, and with 5% margin of

102 error, calculated sample size,  $n = (1.96)^2 * \frac{0.33(1-0.33)}{(0.05)^2} = 340$

103 The sampling technique was systematic sampling. Every third patient attending ANC Corner for  
104 antenatal checkups in both government and private hospitals was selected as a participant in the  
105 interview for data collection.

### 106 **Data Collection Tools**

107 The presence of depression was assessed by the Bengali-translated version of the Edinburgh  
108 Postnatal Depression Scale (EPDS). This questionnaire consists of 10 questions scoring from 0  
109 to 30. A score of 10 or higher on the assessment indicates probable antenatal depression.

110 Another structured questionnaire, which was also translated into Bengali, was used to collect  
111 data on the sociodemographic, obstetric, psychosocial, psychological, and disease and treatment-  
112 related factors of patients. The questionnaire was tested on some target population rather than the  
113 study participants and the necessary changes were made before the data collection.

## 114 **Data Management & Analysis Plan**

115 The data for the study was analyzed by STATA version 14. Pearson's chi-square test was  
116 performed to find out the possible association of sociodemographic, obstetric, psychosocial,  
117 disease, and treatment-related factors with prenatal depression. A binary logistic regression was  
118 also performed to find out the crude odds ratio of variables. To adjust the confounding factors, a  
119 multivariate analysis using multivariate logistic regression was performed. Adjusted and  
120 unadjusted odds ratio and their 95% CI were used as indicators strength of the association.

## 121 **Ethical Considerations**

122 Ethical permission was taken from the Institutional Ethics Committee of North South University  
123 before data collection (Approval Number: 2023/OR-NSU/IRB/1224). Permission letters from  
124 Upazila Health Complex, Lohagara, and Khan General Hospital, Lahuria were also obtained.  
125 Informed written consent was obtained from pregnant mothers of 18 years or more and guardians  
126 of pregnant women aged below 18 years before data collection. The respondents were assured of

127 the confidentiality of information and also informed about the purpose, advantages, and potential  
128 risks of the study.

129

## 130 **Result**

### 131 **Socio-demographic Characteristics of Pregnant Mothers**

132 In this research involving 350 women in any trimester of gestation, with a high response rate of  
133 98.5%, several demographic characteristics were examined. The median Edinburgh Postnatal  
134 Depression Scale (EPDS) score was 8, with an interquartile range of 4 to 12. The respondents  
135 had a median age of 23 years, falling within an interquartile range of 20 to 27 years. Among the  
136 respondents, 5.7% (20) were below 18 years old, while a majority of 83.7% were in the age  
137 bracket of 18 to 30 years. The rest 10.6% were over their thirties.

138 Regarding educational background, 26 participants (7.4%) did not have a minimum primary  
139 level education. All participants were married, with the majority being housewives. However, a  
140 small percentage (4%) were employed. In terms of monthly family income, 26% of women (91)  
141 had an income below 10,000 tk, 58% (203) had an income between 10,000 to 20,000 tk, and the  
142 remaining 16% (56) had an earning per month exceeding 20,000 tk.

143 Religiously, the participants belonged to two communities, with 96.3% (337) identifying as  
144 Muslim and 3.71% (13) as Hindu. These demographic details provide a comprehensive snapshot  
145 of the participants in the study, offering insights into their socioeconomic and cultural  
146 backgrounds.

### 147 **Obstetric History of Pregnant Mothers**

148 A large percentage (53.4%) of respondents were in their second trimesters. 107 women (30.6%)  
149 were in the third trimester, and the rest 16% (56) were passing the first trimester. In this study,  
150 the median age of marriage was found to be 18 years, with an interquartile range spanning from  
151 16 to 19 years. Significantly, almost half of the participants (48.6%) reported a history of getting  
152 married before the age of 18. Regarding pregnancy status, 38.6% (135) of the total expectant  
153 mothers were experiencing pregnancy for the first time.

154 Among the multiparous women, 51% (105) had undergone at least one cesarean section (46.6%  
155 only caesarian section, 4.4 % had both vaginal delivery and caesarian section), and 30.6% (63)  
156 faced complications during their previous deliveries. Additionally, 21.5% (75) of the women  
157 reported a history of abortion, stillbirth, or intrauterine fetal death. These findings provide  
158 important contextual information about the participants' marital and reproductive histories,  
159 contributing to a more comprehensive understanding of the factors influencing antenatal  
160 depression in this population.

## 161 **Psychosocial Criteria of Pregnant Mothers**

162 In the study, 74% of the women (259) reported that their current pregnancies were planned,  
163 while 26% (91) indicated the opposite. Regarding satisfaction with their husbands' behavior, the  
164 majority of women (50.3%) expressed moderate satisfaction, while a small proportion (4.8%)  
165 reported poor relationship status.

166 Concerning relationships with in-laws, the majority (77.8%) reported good relationships, and  
167 15.7% (55) described their relationships as moderate. However, 6% (21) of women had a history  
168 of poor relationship status, with 1.43% (5) being separated from or having deceased parents-in-  
169 law.



170 The study also highlighted instances of violence. Approximately 5.14% of women (19) reported  
171 being victims of domestic violence, and 5.43% (18) reported experiencing sexual violence.  
172 Notably, 10% of women (35) had faced sexual violations during the current pregnancy.  
173 Additionally, family dynamics played a role, with 18.6% of women (65) reporting that their  
174 husbands preferred male children, and 18% (63) mentioned specific demands from their in-laws  
175 for a male child. These findings provide insights into the social and familial factors that may  
176 contribute to antenatal depression in the study population.

### 177 **Disease and Treatment-related History of Pregnant Mothers**

178 Among the 350 women, 37 (10.57%) were suffering from diseases like Diabetes Mellitus,  
179 Hypertension, Bronchial Asthma, and Thyroid disorders, while 49 (14%) had a history of at least  
180 one previous surgery other than caesarian section.

### 181 **Psychological Factors of Pregnant Mothers**

182 In the study, a small percentage of women reported certain marital challenges. Specifically,  
183 2.57% (9) of the women mentioned that their husbands had other wives, and a couple of women  
184 (0.6%) indicated a history of their husbands having extra-marital relationships with other  
185 women. However, none of the participants reported having such relationships themselves. These  
186 findings offer insights into the complex dynamics within marital relationships and potential  
187 factors that may contribute to antenatal depression in the studied population.

### 188 **Prevalence of Depression among Pregnant Mothers**

189 In the study, the scores from the 30 questions of the Edinburgh Postnatal Depression Scale  
190 (EPDS) were summed up, creating a new variable ranging from 0 to 30. The findings revealed  
191 that 150 (42.9%) women had none or minimal depression, and 141 women (40.29%) had mild  
192 depression, scoring between 7 to 13 on the EPDS. Another 43 women (12.29%) scored between  
193 14 to 19, indicating moderate depression. Additionally, 16 women (4.57%) had severe  
194 depression, with scores exceeding 19. Table 1

195 **Table 1. Extent of Depression among pregnant women in Lohagara**

196

| Extent of Antenatal Depression |            |     |      |
|--------------------------------|------------|-----|------|
| Class                          | EPDS score | n   | %    |
| None or minimal Depression     | 0-6        | 150 | 42.9 |
| Mild Depression                | 7-13       | 141 | 40.3 |
| Moderate Depression            | 14-19      | 47  | 13.4 |
| Severe depression              | 20-30      | 12  | 3.4  |

197

198

199

200

201

202 To simplify the interpretation, the scores were further categorized into two classes: "Having  
203 Depression" and "No Depression." A cut-off score of 10 or more was used to indicate the  
204 presence of depression. The results showed that nearly one in three women (38.86%, with a 95%  
205 confidence interval ranging from 33.9% to 44%) exhibited symptoms of depression during  
206 pregnancy. These figures highlight the prevalence and varying degrees of depression among the  
207 study participants **Error! Reference source not found.**

208 **Table 2. Prevalence of Antenatal Depression in Lohagara**

| <b>Prevalence of Antenatal Depression</b> |                   |          |          |
|-------------------------------------------|-------------------|----------|----------|
| <b>Depression</b>                         | <b>EPDS score</b> | <b>n</b> | <b>%</b> |
| Yes                                       | 10-30             | 136      | 38.86    |
| No                                        | 0-9               | 214      | 61.14    |

209

210 **Factors associated with Antenatal Depression**

211 Sociodemographic, Obstetric, Psychosocial, Psychological, and Disease and treatment-related  
 212 factors were used to identify the factors that were significantly associated with the development  
 213 of depression in pregnancy. Among the variables, gestational week, number of pregnancies, type  
 214 of pregnancy, relationship with husband as well as in-laws, history of domestic and sexual  
 215 violence, having a husband with multiple marriages, and history of previous disease were found  
 216 statistically significant with a p-value <0.05 in the chi-square test Table 3.

217 **Table 3. Factors associated with antenatal depression in women visiting for antenatal**  
 218 **check-ups in UHC, Lohagara, and Khan General Hospital, Lahuria from July to August**  
 219 **2023 (bivariate analysis by chi-squared test).**

| <b>Variables</b> | <b>Category</b> | <b>No Depression</b> | <b>Mild Depression</b> | <b>Moderate depression</b> | <b>Severe Depression</b> | <b>Chi2 p-value</b> |
|------------------|-----------------|----------------------|------------------------|----------------------------|--------------------------|---------------------|
| Gestational week | <12 weeks       | 14<br>9.3%           | 30<br>21.3%            | 10<br>21.3%                | 2<br>16.7%               | 0.026               |
|                  | 12-28 weeks     | 92<br>61.3%          | 74<br>52.5%            | 15<br>31.9%                | 6<br>50%                 |                     |

|                           |                |              |             |             |            |       |
|---------------------------|----------------|--------------|-------------|-------------|------------|-------|
|                           | 29-40 weeks    | 44<br>29.3%  | 37<br>26.2% | 22<br>46.8% | 4<br>33.3% |       |
| Para                      | Nulliparous    | 68<br>45.3%  | 48<br>34.4% | 16<br>34.4% | 3<br>25%   | 0.005 |
|                           | Multiparous    | 82<br>54.7%  | 93<br>66%   | 31<br>66%   | 9<br>75%   |       |
| Type of pregnancy         | Planned        | 123<br>82%   | 97<br>68.8% | 35<br>72.3% | 4<br>33.3% | 0.002 |
|                           | Unplanned      | 27<br>18%    | 44<br>21.2% | 12<br>27.7% | 8<br>66.7% |       |
| Relationship with husband | Good           | 72<br>48%    | 60<br>42.6% | 22<br>46.8% | 3<br>25%   | 0.017 |
|                           | Moderate       | 73<br>48.7%  | 78<br>55.3% | 20<br>42.6% | 5<br>41.7% |       |
|                           | Poor           | 5<br>3.3%    | 3<br>2.1%   | 5<br>10.6%  | 4<br>33.3% |       |
| Relationship with in-laws | Good           | 128<br>85.3% | 110<br>78%  | 28<br>79.6% | 3<br>25%   | 0.001 |
|                           | Moderate       | 16<br>10.7%  | 24<br>17%   | 12<br>25.5% | 3<br>25%   |       |
|                           | Poor           | 5<br>3.3%    | 4<br>2.8%   | 7<br>14.9%  | 5<br>41.7% |       |
|                           | Dead/Separated | 1<br>0.7%    | 3<br>2%     | 0           | 1<br>8.3%  |       |

|                    |     |              |              |             |             |       |
|--------------------|-----|--------------|--------------|-------------|-------------|-------|
| Domestic violence  | Yes | 5<br>3.3%    | 7<br>5%      | 4<br>8.5%   | 2<br>16.7%  | 0.047 |
|                    | No  | 145<br>96.7% | 134<br>95%   | 43<br>91.5% | 10<br>83.3% |       |
| Sexual violence    | Yes | 4<br>2.7%    | 9<br>6.4%    | 3<br>6.4%   | 3<br>25%    | 0.007 |
|                    | No  | 146<br>97.3% | 132<br>93.6% | 44<br>93.6% | 9<br>75%    |       |
| Polygamous husband | Yes | 1<br>0.7%    | 4<br>2.8%    | 1<br>2%     | 3<br>25%    | 0.002 |
|                    | No  | 149<br>99.3% | 137<br>97.2% | 46<br>97.9% | 9<br>75%    |       |
| Previous disease   | Yes | 9<br>6%      | 18<br>12.8%  | 7<br>14.9%  | 3<br>25%    | 0.007 |
|                    | No  | 141<br>94%   | 123<br>87.2% | 40<br>85%   | 9<br>75%    |       |

220

221 A binary logistic regression was also performed to find out the odds ratio of variables Table 4.

222 These covariates were then considered for the multiple logistic regression analysis.

223 **Table 4. Factors associated with prenatal depression among women attending antenatal**

224 **care in UHC, Lohagara and Khan General Hospital, Lahuria from June to August 2023**

225 **(after bivariate and multivariate regression analysis).**

| Variables | Category | Depression | No | COR | AOR |
|-----------|----------|------------|----|-----|-----|
|-----------|----------|------------|----|-----|-----|

|                           |             |    | <b>Depression</b> | <b>(95% CI)</b>  | <b>(95% CI)</b> |
|---------------------------|-------------|----|-------------------|------------------|-----------------|
| Gestational week          | <12 weeks   | 30 | 26                | 1                | 1               |
|                           | 12-28 weeks | 63 | 124               | 0.4 (0.2, 0.8)   | 0.4 (0.2, 0.8)  |
|                           | 29-40 weeks | 43 | 64                | 0.6 (0.3, 1.1)   | 0.6 (0.3, 1.2)  |
| Para                      | Nulliparous | 40 | 95                | 0.5 (0.3, 0.8)   | 0.9 (0.5, 1.5)  |
|                           | Multiparous | 96 | 119               | 1                | 1               |
| Type of pregnancy         | Planned     | 88 | 171               | 1                | 1               |
|                           | Unplanned   | 48 | 43                | 2.2 (1.4, 3.6)   | 1.8 (1, 3.1)    |
| Relationship with husband | Good        | 55 | 102               | 1                | 1               |
|                           | Moderate    | 69 | 107               | 1.2 (0.8, 1.9)   | 1.2 (0.7, 1.9)  |
|                           | Poor        | 12 | 5                 | 4.5 (1.3, 13.3)  | 1.6 (0.3, 8.9)  |
| Relationship with in-laws | Good        | 91 | 178               | 0.3 (0.06, 2.08) | 2.6 (0.2, 38.7) |
|                           | Moderate    | 27 | 28                | 0.6 (0.1, 4)     | 4.7 (0.3, 71.7) |
|                           | Poor        | 15 | 6                 | 1.7 (0.2, 12.6)  | 11.2 (0.6, 194) |
|                           | Dead/       | 3  | 2                 | 1                | 1               |

|                    | Separated |     |     |                   |                |
|--------------------|-----------|-----|-----|-------------------|----------------|
| Domestic violence  | Yes       | 11  | 7   | 2.6 (1, 6.9)      | 1.2 (0.3, 5.7) |
|                    | No        | 125 | 207 | 1                 | 1              |
| Sexual violence    | Yes       | 13  | 6   | 3.7 (1.4, 9.9)    | 3.3 (1.1, 9.6) |
|                    | No        | 123 | 208 | 1                 | 1              |
| Polygamous husband | Yes       | 8   | 1   | 13.3 (1.6, 107.7) | 13.6 (1.1,163) |
|                    | No        | 128 | 213 | 1                 | 1              |
| Previous disease   | Yes       | 22  | 15  | 2.6 (1.3, 5.1)    | 2.4 (1.1, 5.3) |
|                    | No        | 114 | 199 | 1                 | 1              |

226

227 Gestational weeks, intimate partner violence, unwanted pregnancy, a history of previous disease,  
 228 and multiple married husbands were found to be significantly associated with the development of  
 229 depression in pregnancy. Those who were in their 2nd trimester of pregnancy had 60% less  
 230 chance of developing antenatal depression than those who were in the first trimester. (AOR: 0.4,  
 231 95% CI: 0.2, 0.8) Table 5.

232 **Table 5. Multivariate logistic regression of possible factors associated with antenatal**  
 233 **depression in women visiting for antenatal check-ups in UHC, Lohagara, and Khan**  
 234 **General Hospital, Lahuria from July to August 2023.**

| Variables | Category | Reference | Odds | P> z |
|-----------|----------|-----------|------|------|
|-----------|----------|-----------|------|------|

|                              |             | <b>Category</b> | <b>ratio</b> |              |
|------------------------------|-------------|-----------------|--------------|--------------|
| Gestational week             | 13-28       | <13             | 0.40967      | <b>0.008</b> |
|                              | >28         |                 | 0.59227      | 0.15         |
| Para                         | Nulliparous | Multiparous     | 0.88095      | 0.633        |
| Type of pregnancy            | Unplanned   | Planned         | 1.81135      | <b>0.027</b> |
| Relationship with husband    | Moderate    | Good            | 1.15832      | 0.562        |
|                              | Poor        |                 | 1.59752      | 0.593        |
| Relationship with in-laws    | Good        | Dead/ Separated | 1.85478      | 0.653        |
|                              | Moderate    |                 | 3.57372      | 0.363        |
|                              | Poor        |                 | 8.56358      | 0.098        |
| Domestic violence            | Yes         | No              | 1.2175       | 0.803        |
| Sexual violence              | Yes         | No              | 3.09672      | <b>0.03</b>  |
| Polygamous husband           | Yes         | No              | 13.6921      | <b>0.04</b>  |
| History of previous diseases | Yes         | No              | 2.56009      | <b>0.025</b> |

235

236 Among the pregnant women suffering from depression, 53.6% (30) were in the first trimester.

237 33.7% (60) of prenatally depressed women were between 13 to 28 weeks of gestation. 40% (43)

238 were passing their 3<sup>rd</sup> trimester of pregnancies.

239 The odds ratio revealed three times increase in expectant women who had a history of

240 experiencing intimate partner violence than those who did not have (AOR: 3.3, 95% CI: 1.1,

241 9.7).



242 Women facing intimate partner violence showed elevated levels of various forms of antenatal  
243 depression. Roughly 21% (4) of pregnant women with a background of intimate partner violence  
244 did not experience depression or had minimal symptoms, 47.4% (9) had mild depression, 15.8%  
245 (3) had moderate depression, and another 15.8% (3) dealt with severe depression.

246 Type of pregnancy was also an important contributing factor as the odds ratio raised about two  
247 times in cases of unplanned pregnancy (AOR: 1.8, 95% CI: 1, 3).

248 women had a history of unplanned pregnancy. Among them, 52.8% (48) were experiencing  
249 prenatal depression. 34% (98) of the total 259 expectant mothers having a history of intended  
250 pregnancies, were suffering from antenatal depression.

251 The incidence of moderate depression was nearly identical in both intended and unintended  
252 pregnancies, ranging from 13.2% to 13.5%. However, in the case of unwanted pregnancies, the  
253 rates of mild and severe depression were higher (mild depression: 48.4%, severe depression:  
254 8.8%). Out of the 91 women with a history of unintended pregnancies, 48.4% (44) reported mild  
255 depression, 13.2% (12) experienced moderate depression, and 8.8% (8) had severe depression.  
256 Additionally, 29.7% (27) showed no or minimal signs of depression.

257 In contrast, among the total of 259 women with planned pregnancies, 37.5% (97) were dealing  
258 with mild depression, 13.5% (35) reported moderate depression, and 1.5% (4) experienced  
259 severe depression. Moreover, 47.5% (123) exhibited no or minimal signs of depression.

260 Women suffering from a disease from the past showed a 2 times escalated odds ratio than those  
261 who were free from any medical condition (AOR: 2.4, 95% CI: 1.1, 5.2).

262 Out of the pregnant women undergoing prenatal depression, 59.5% (22) had a history of prior  
263 diseases or illnesses. Within this group, 48.7% (18) were dealing with mild depression, 19% (7)

264 with moderate depression, and 8.1% (3) with severe depression. Additionally, 24% (9) showed  
265 no or minimal signs of depression.

266 On the other hand, pregnant women married to husbands who have multiple wives unveiled a 13  
267 times higher odds ratio than those having single-married husbands (AOR: 13.6, 95% CI: 1.1,  
268 164).

269 Approximately 89% (8) of women with a history of multiple-married husbands were grappling  
270 with prenatal depression. Within this group, approximately 55.6% (5) were undergoing mild to  
271 moderate depression, while the remaining 33.3% (3) were dealing with severe depression during  
272 pregnancy. The rest 11.1% did not experience depression or had minimal symptoms.

273

## 274 **Discussion**

275 This study aimed to assess the prevalence and evaluate the sociodemographic, obstetric,  
276 psychosocial, psychological, and disease and treatment-related determinants associated with the  
277 development of antenatal depression in a rural subdistrict in Narail. The point prevalence of  
278 antenatal depression accounted for 39% (38.86%, 95% confidence interval: 33.9% to 44%) in  
279 this study. The elevated odds ratio of Antenatal Depression Syndrome (ADS) is attributed to  
280 several significant social determinants, including sexual violence, and unplanned pregnancy.  
281 Additionally, having a polygamous husband is identified as a crucial psychological factor, while  
282 a history of previous disease serves as a notable disease and treatment-related factor contributing  
283 to the increased odds of ADS. Gestational week is an important obstetric factor associated with  
284 depression in pregnancy.

285 The obtained prevalence of depression in pregnancy in this study is in agreement with the  
286 prevalence in lower (34.0%, 95% Confidence Interval: 33.1%-34.9%) and middle-income  
287 countries ( 22.7%, 95% Confidence Interval: 20.1%-25.2%) (20). The result of this study also  
288 aligns with the study conducted by Gausia et al. (33%, 95% CI, 27.6–37.5) (13), and Tasnim et  
289 al. (36.2% in patients with GDM) (21), and that is perhaps because of similar locations.  
290 However, this is higher than the study of Nasreen et al. (18.3%, 95% CI:15.9%-20.7%) (22).  
291 That is probably because of the differences in the research methodology like sample size and  
292 study area. This study was conducted in Narail, which is a district of Khulna division, while the  
293 study conducted by Nasreen et al. was in the Mymensingh division, and there was a significant  
294 gap between the period of conduction of both studies. The sample sizes are also different from  
295 each other. Another study was conducted in a rural district in Sylhet which showed a higher  
296 prevalence (56.6%, 95.5% CI 50.0–63.0%) of ADS than the prevalence obtained from this study.  
297 The reason behind this distinction can be the difference in the location and number of  
298 participants involved. A majority of women in the Khulna division, specifically 88.6%, have no  
299 more than a primary education. 61% of mothers are unaware of the presence of Maternal Health  
300 Clinics (MHC) in this area, and 36% of them are receivers of any form of antenatal care (ANC)  
301 only. Additionally, ANC services from government healthcare facilities are sought by 47% of  
302 expectant mothers. Regardless of potential complications and warning signs, 95% of births  
303 usually take place at home that are assisted by untrained birth attendants. Merely, postnatal care  
304 (PNC) is provided among 19.75% of mothers and 12.3% of infants. Multiple factors contribute  
305 to the limited utilization of Maternal Health Clinic (MHC) services, including poor  
306 communication, insufficient awareness of MHC services, limited financial resources, decision-

307 making processes, and the absence of a companion for accessing healthcare services (23). On the  
308 other hand, variations in the sample sizes are also an influencing factor for the differences.

309 Violence is a common problem in Bangladesh and it is one of the countries having the highest  
310 records of violence (24). Intimate partner violence was revealed as a significant contributing  
311 factor in many studies which include domestic and sexual violence. It encompasses various  
312 forms of abusive behavior, including physical violence that occurs at any point in the  
313 relationship, instances of forced sexual activity, and physical violence specifically during  
314 pregnancy. (25). 37% of women living in cities and half of the village women are sufferers of  
315 lifetime sexual violence. Causes include the history of physical abuse of mothers-in-law by  
316 fathers-in-law, The degree of husband's controlling conduct, and the occurrence of forced or  
317 coerced initial sexual activity. In rural areas, the likelihood of this violence increased when  
318 women were between the ages of 20-24 as opposed to 15-19 and when there was a dowry  
319 demand during marriage (26). In Bangladesh, a percentage of women believe, their husbands  
320 have the right to raise their hands on them. Some women, who have been seeing their mothers  
321 become dominated and being hit by their fathers for a long time, take it easy to believe that their  
322 husbands can not only dominate them but also bear the right to beat them. These two groups of  
323 women are more likely to be the victims of intimate partner violence (27). This study found  
324 intimate partner violence as a significant contributing factor to antenatal depression which is  
325 similar to the study conducted by Peltzer et al. in Thailand and Insan et al. in Bangladesh (12,  
326 28).

327 This study obtained unplanned pregnancy as a responsible factor for antenatal depression.  
328 Brazilian women who have experienced unplanned pregnancies face a 2.5 times higher risk of  
329 experiencing depression during both pregnancy and the postpartum period compared to their

330 counterparts who have had planned pregnancies (29). Postnatal depressive symptoms among  
331 socio-economically disadvantaged rural Bangladeshi women are notably linked to the perception  
332 of paternal pregnancy unwantedness and couple pregnancy discordance. Additionally, maternal  
333 intentions and pregnancy discordance are associated with prenatal depressive symptoms in this  
334 population (30). A study conducted by Surkan et al. in northwestern Bangladesh and another  
335 study conducted by Gausia et. al in eastern Bangladesh showed that unwanted pregnancy is a  
336 significantly associated factor of antenatal depression which is similar to this study (13, 30).

337 Within the realm of obstetric factors, the gestational week emerges as a notable element  
338 influencing the onset of prenatal depression. The study reveals a substantial decrease in the  
339 likelihood of developing depression, amounting to a 60% reduction during the second trimester  
340 compared to the first trimester. This aligns with findings from a systematic review and meta-  
341 analysis conducted by Okagbue et al., encompassing 26 articles, which underscores that the  
342 prevalence of antenatal depression tends to be lower between the 13th and 28th weeks of  
343 gestation (31).

344 While some studies have identified family support and a preference for the male gender within  
345 families as significant contributing factors to prenatal depression (12, 13), this particular study  
346 did not observe such associations. It suggests that with the progression of time, contemporary  
347 family members may be more attentive and supportive of pregnant mothers than in the past.  
348 Additionally, the inclination toward preferring male children within families appears to be less  
349 prevalent today compared to historical trends. This study specifically noted that 18.5% (65) of  
350 women reported a history of male baby preference from their husbands, and 18% (63) from their  
351 families. However, a substantial majority, around 82%, did not report any history of a preference  
352 for male children from either their husbands or family members.

353 However, unlike other studies, this study identified noteworthy connections between a previous  
354 history of any disease and having a polygamous husband with depression during pregnancy. In a  
355 study carried out by Nasreen et al. in rural sub-districts of Mymensingh, a significant correlation  
356 was identified between a previous history of depression and prenatal depression (22). This  
357 research revealed that women with a previous mental health condition, as well as those with a  
358 history of other ailments such as Diabetes mellitus, Hypertension, and Thyroid disorders, are  
359 prone to experiencing depression during pregnancy.

## 360 **Limitations**

361 In summary, this study faced limitations primarily stemming from a small and constrained  
362 sample size due to time and resource limitations. The study was carried out with women  
363 attending antenatal check-ups at a particular government and private hospital in Lohagara.  
364 Nevertheless, there could be a subset of women who do not seek medical attention throughout  
365 their entire pregnancy unless they experience extreme physical challenges. In many instances,  
366 these women opt for home deliveries assisted by unskilled birth attendants, bypassing hospitals  
367 during childbirth. For this reason, the findings may not fully capture the diversity of the entire  
368 community population, limiting the generalizability of obtained results.

369

## 370 **Conclusion**

371 In conclusion, the prevalence and associated factors of antenatal depression in rural Bangladesh  
372 highlight a critical public health concern with far-reaching consequences for both mothers and  
373 newborns. Antenatal depression is frequently observed in the rural areas of Bangladesh,

374 emphasizing the importance of increasing awareness among healthcare professionals and family  
375 members. This awareness is crucial to offer additional mental support to pregnant women,  
376 especially in their first and third trimesters of gestation. Furthermore, formulating strategic plans  
377 and policies is essential to reduce intimate partner violence and discourage polygamy. The  
378 situation also underscores the necessity of providing extra care to mothers with a history of  
379 health-related issues and offering additional counseling to those who find themselves  
380 unexpectedly pregnant.

381 To effectively tackle this issue, it is imperative for the government, stakeholders, and  
382 policymakers to collaborate on comprehensive national programs and health education  
383 campaigns. Resource allocation and the formulation of definitive policies are crucial steps  
384 toward raising awareness and destigmatizing mental health concerns in rural communities. By  
385 addressing the root causes and promoting a proactive approach to mental health, we can work  
386 towards reducing the prevalence of antenatal depression and ultimately safeguarding the well-  
387 being of both mothers and newborns in rural Bangladesh.

388

## 389 **Supporting Information**

390 [S1 File](#). Dataset.

391 <https://doi.org/10.6084/m9.figshare.24994110> (xlsx)

## 392 **Acknowledgement**

393 I am profoundly thankful to the Almighty for granting me the opportunity to pursue MPH  
394 (Epidemiology) at North South University. I am also grateful to North South University for  
395 allowing me to do the research for the partial fulfillment of my MPH degree. My gratitude  
396 extends to my supervisor, Dr. Dipak Kumar Mitra, Ph.D., MPH, MBBS, the current chairman of  
397 the Department of Public Health at North South University, for his kind advice and guidance. I  
398 am greatly thankful to Dr.S M Mashud, UH&FPO, Upazila Health Complex, Lohagara, for his  
399 wonderful guidance and unwavering support to carry out the study.

400

## 401 **References**

- 402 1. World Health Organization. Depression and other common mental disorders: global health  
403 estimates. 2017.
- 404 2. Mathers CD, Loncar D. Projections of global mortality and burden of disease from 2002 to 2030.  
405 PLoS medicine. 2006;3(11):e442.
- 406 3. Kuehner C. Gender differences in unipolar depression: an update of epidemiological findings and  
407 possible explanations. Acta Psychiatrica Scandinavica. 2003;108(3):163-74.
- 408 4. Osman NN, Bahri AI. Impact of altered hormonal and neurochemical levels on depression  
409 symptoms in women during pregnancy and postpartum period. Journal of Biochemical Technology.  
410 2019;10(1):16.
- 411 5. Dadi AF, Miller ER, Bisetegn TA, Mwanri L. Global burden of antenatal depression and its  
412 association with adverse birth outcomes: an umbrella review. BMC public health. 2020;20:1-16.
- 413 6. Mukherjee S, Trepka MJ, Pierre-Victor D, Bahelah R, Avent T. Racial/ethnic disparities in  
414 antenatal depression in the United States: A systematic review. Maternal and child health journal.  
415 2016;20:1780-97.
- 416 7. Chatillon O, Even C. La dépression de l'antepartum: prévalence, diagnostic, traitement.  
417 L'Encéphale. 2010;36(6):443-51.
- 418 8. Mitchell-Jones N, Gallos I, Farren J, Tobias A, Bottomley C, Bourne T. Psychological morbidity  
419 associated with hyperemesis gravidarum: a systematic review and meta-analysis. BJOG: An International  
420 Journal of Obstetrics & Gynaecology. 2017;124(1):20-30.
- 421 9. Biaggi A, Conroy S, Pawlby S, Pariante CM. Identifying the women at risk of antenatal anxiety  
422 and depression: a systematic review. Journal of affective disorders. 2016;191:62-77.
- 423 10. Minamoto VB, Suzuki KP, Bremner SN, Lieber RL, Ward SR. Dramatic changes in muscle  
424 contractile and structural properties after 2 botulinum toxin injections. Muscle & nerve. 2015;52(4):649-  
425 57.
- 426 11. Woody C, Ferrari A, Siskind D, Whiteford H, Harris M. A systematic review and meta-regression  
427 of the prevalence and incidence of perinatal depression. Journal of affective disorders. 2017;219:86-92.



- 428 12. Insan N, Forrest S, Jaigirdar A, Islam R, Rankin J. Social Determinants and Prevalence of  
429 Antenatal Depression among Women in Rural Bangladesh: A Cross-Sectional Study. *International Journal*  
430 *of Environmental Research and Public Health*. 2023;20(3):2364.
- 431 13. Gausia K, Fisher C, Ali M, Oosthuizen J. Antenatal depression and suicidal ideation among rural  
432 Bangladeshi women: a community-based study. *Archives of women's mental health*. 2009;12:351-8.
- 433 14. Franke K, Bergh Bvd, de Rooij SR, Roseboom TJ, Nathanielsz PW, Witte OW, et al. Effects of  
434 prenatal stress on structural brain development and aging in humans. *bioRxiv*. 2017:148916.
- 435 15. Hoirisch-Clapauch S, Brenner B, Nardi AE. Adverse obstetric and neonatal outcomes in women  
436 with mental disorders. *Thrombosis Research*. 2015;135:S60-S3.
- 437 16. Horrigan TJ, Schroeder AV, Schaffer RM. The triad of substance abuse, violence, and depression  
438 are interrelated in pregnancy. *Journal of substance abuse treatment*. 2000;18(1):55-8.
- 439 17. Bitew T, Hanlon C, Kebede E, Honikman S, Fekadu A. Antenatal depressive symptoms and  
440 perinatal complications: a prospective study in rural Ethiopia. *BMC psychiatry*. 2017;17:1-12.
- 441 18. Yedid Sion M, Harlev A, Weintraub AY, Sergienko R, Sheiner E. Is antenatal depression  
442 associated with adverse obstetric and perinatal outcomes? *The Journal of Maternal-Fetal & Neonatal*  
443 *Medicine*. 2016;29(6):863-7.
- 444 19. Imran N, Haider II. Screening of antenatal depression in Pakistan: risk factors and effects on  
445 obstetric and neonatal outcomes. *Asia-Pacific Psychiatry*. 2010;2(1):26-32.
- 446 20. Fekadu Dadi A, Miller ER, Mwanri LJPo. Antenatal depression and its association with adverse  
447 birth outcomes in low and middle-income countries: a systematic review and meta-analysis.  
448 2020;15(1):e0227323.
- 449 21. Tasnim Sd, Aunty FM, Hassan Y, Yesmin R, Ara I, Mohiuddin MS, et al. Antenatal depression  
450 among women with gestational diabetes mellitus: a pilot study. *Reproductive Health*. 2022;19(1):71.
- 451 22. Nasreen HE, Kabir ZN, Forsell Y, Edhborg M. Prevalence and associated factors of depressive and  
452 anxiety symptoms during pregnancy: a population based study in rural Bangladesh. *BMC women's*  
453 *health*. 2011;11(1):1-9.
- 454 23. Haque MA, Dash SK, Chowdhury MABJBph. Maternal health care seeking behavior: the case of  
455 Haor (wetland) in Bangladesh. 2016;16(1):1-9.
- 456 24. García-Moreno C, Jansen HA, Ellsberg M, Heise L, Watts C. WHO multi-country study on  
457 women's health and domestic violence against women: World Health Organization; 2005.
- 458 25. Garcia-Moreno C, Jansen HA, Ellsberg M, Heise L, Watts CHJI. Prevalence of intimate partner  
459 violence: findings from the WHO multi-country study on women's health and domestic violence.  
460 2006;368(9543):1260-9.
- 461 26. Naved RTJAosb. Sexual violence towards married women in Bangladesh. 2013;42:595-602.
- 462 27. Islam TM, Tareque MI, Sugawa M, Kawahara KJJofv. Correlates of intimate partner violence  
463 against women in Bangladesh. 2015;30:433-44.
- 464 28. Peltzer K, Pengpid S. Associations between intimate partner violence, depression, and suicidal  
465 behavior among women attending antenatal and general outpatients hospital services in Thailand.  
466 *Nigerian journal of clinical practice*. 2017;20(7):892-9.
- 467 29. Faisal-Cury A, Menezes PR, Quayle J, Matijasevich A. Unplanned pregnancy and risk of maternal  
468 depression: secondary data analysis from a prospective pregnancy cohort. *Psychology, health &*  
469 *medicine*. 2017;22(1):65-74.
- 470 30. Surkan PJ, Strobino DM, Mehra S, Shamim AA, Rashid M, Wu LS-F, et al. Unintended pregnancy  
471 is a risk factor for depressive symptoms among socio-economically disadvantaged women in rural  
472 Bangladesh. *BMC pregnancy and childbirth*. 2018;18:1-13.
- 473 31. Okagbue HI, Adamu PI, Bishop SA, Oguntunde PE, Opanuga AA, Akhmetshin EM. Systematic  
474 review of prevalence of antepartum depression during the trimesters of pregnancy. *Open access*  
475 *Macedonian journal of medical sciences*. 2019;7(9):1555.
